# Supplementary material for: Neuropsychiatric symptoms in genetic frontotemporal dementia: developing a new module for Clinical Rating Scales
Source: HighWire-hosted journal article supplement (doi:10.1136/jnnp-2022-330152), 2023-01-10

**Supplementary Table 1. Neuropsychiatric symptoms included in the GENFI Symptom Scales in the History assessment. Scoring of each symptom**

is on a scale similar to the CDR i.e. 0 (absent), 0.5 (very mild/questionable), 1 (mild), 2 (moderate), and 3 (severe).

|   |                                                                                                              | <b>Questionable/<br/>Very mild</b>                                          | <b>Mild</b>                                                                        | <b>Moderate</b>                                                                                                    | <b>Severe</b>                                                                                                                                         |
|---|--------------------------------------------------------------------------------------------------------------|-----------------------------------------------------------------------------|------------------------------------------------------------------------------------|--------------------------------------------------------------------------------------------------------------------|-------------------------------------------------------------------------------------------------------------------------------------------------------|
| 0 | <b>Neuropsychiatric</b>                                                                                      | Questionable neuropsychiatric symptoms.                                     | Mild but definite neuropsychiatric symptoms.                                       | Moderate neuropsychiatric symptoms.                                                                                | Severe neuropsychiatric symptoms.                                                                                                                     |
| 1 | <b>Visual hallucinations</b><br>Sees things that are not there                                               | Some hallucinations may have occurred but are of questionable significance  | Hallucinations are present but harmless and cause little distress for the patient. | Hallucinations are distressing and are disruptive to the patient.                                                  | Hallucinations are very disruptive and a major source of behavioural disturbance. PRN medications may be required to control them.                    |
| 2 | <b>Auditory hallucinations</b><br>Hears voices                                                               | Some hallucinations may have occurred but are of questionable significance. | Hallucinations are present but harmless and cause little distress for the patient. | Hallucinations are distressing and are disruptive to the patient.                                                  | Hallucinations are very disruptive and a major source of behavioural disturbance. PRN medications may be required to control them.                    |
| 3 | <b>Tactile hallucinations</b><br>Feels things that are not there                                             | Some hallucinations may have occurred but are of questionable significance. | Hallucinations are present but harmless and cause little distress for the patient. | Hallucinations are distressing and are disruptive to the patient.                                                  | Hallucinations are very disruptive and a major source of behavioural disturbance. PRN medications may be required to control them.                    |
| 4 | <b>Delusions</b><br>Paranoia, fear of harm, fear of theft, fear of abandonment, delusional misidentification | Some delusions may have occurred but are of questionable significance.      | Delusions present but seem harmless and produce little distress in the patient.    | Delusions are distressing and disruptive.                                                                          | Delusions are very disruptive and are a major source of behavioural disruption. If PRN medications are prescribed, their use signals marked severity. |
| 5 | <b>Depression</b><br>Low mood, tearful, talks about deserving punishment, talks about dying                  | Some features of depression may be present but are not distressing.         | Depression is distressing but usually responds to redirection or reassurance.      | Depression is distressing; depressive symptoms are spontaneously voiced by the patient and difficult to alleviate. | Depression is very distressing and a major source of suffering for the patient.                                                                       |
| 6 | <b>Anxiety</b><br>Feels shaky or tense, worried about planned events, phobic avoidance, separation anxiety   | Some features of anxiety may be present but are not distressing.            | Anxiety is distressing but usually responds to redirection or reassurance.         | Anxiety is distressing, anxiety symptoms are spontaneously voiced by the patient and difficult to alleviate.       | Anxiety is very distressing and a major source of suffering for the patient.                                                                          |

|    |                                                                                                                           |                                                                                                             |                                                                                                                      |                                                                                                            |                                                                                                                                                         |
|----|---------------------------------------------------------------------------------------------------------------------------|-------------------------------------------------------------------------------------------------------------|----------------------------------------------------------------------------------------------------------------------|------------------------------------------------------------------------------------------------------------|---------------------------------------------------------------------------------------------------------------------------------------------------------|
| 7  | <b>Irritability/Lability</b><br>Bad temper, rapid changes in mood, sudden flashes of anger, impatient, argumentative      | Some irritable or labile behaviour may have occurred but of questionable significance.                      | Irritability or lability is notable but usually responds to redirection or reassurance.                              | Irritability and lability are very evident and difficult to overcome by the caregiver.                     | Irritability and lability are very evident; they usually fail to respond to any intervention by the caregiver, and they are a major source of distress. |
| 8  | <b>Agitation/Aggression</b><br>Stubborn, unco-operative, hard to handle, slams doors, throws things, hits or harms others | Some agitated or aggressive behaviour may have occurred but of questionable significance.                   | Agitation is disruptive but can be managed by redirection or reassurance.                                            | Agitation is disruptive and difficult to redirect or control.                                              | Agitation is very disruptive and a major source of difficulty; there may be a threat of personal harm.                                                  |
| 9  | <b>Euphoria/Elation</b><br>Feels too good or too happy, grandiose, childish behaviour                                     | Some euphoria or elated behaviour may have occurred but of questionable significance.                       | Elation is notable to friends and family but is not disruptive.                                                      | Elation is notably abnormal, and disruptive.                                                               | Elation is very pronounced.                                                                                                                             |
| 10 | <b>Aberrant motor behaviour</b><br>Paces without purpose, repeatedly dresses or undresses, excessively fidgety            | Some aberrant motor behaviour may have occurred but of questionable significance.                           | Abnormal motor activity is notable but produces little interference with daily routines.                             | Abnormal motor activity is very evident; can be overcome by the caregiver.                                 | Abnormal motor activity is evident, usually fails to respond to any intervention by the caregiver and is a major source of distress.                    |
| 11 | <b>Hypersexuality</b><br>Unusual or excessive sexual behaviour                                                            | Some unusual or excessive sexual behaviour may have occurred but of questionable significance.              | Sexual behaviour is disruptive but can be managed by redirection or reassurance.                                     | Sexual behaviour is disruptive and difficult to redirect or control.                                       | Sexual behaviour is very disruptive and a major source of difficulty.                                                                                   |
| 12 | <b>Hyperreligiosity</b><br>Increased or unusual religious experiences or feelings                                         | Possible increased or unusual religious experiences may have occurred but are of questionable significance. | Increased or unusual religious experiences are present but seem harmless and produce little distress in the patient. | Increased or unusual religious experiences may be distressing and disruptive.                              | Increased or unusual religious experiences are very disruptive and are a major source of behavioural disruption.                                        |
| 13 | <b>Impaired sleep</b><br>Difficulty sleeping at night, excessive sleep during the day                                     | Possible impaired sleep but of questionable significance.                                                   | Sleep is notably impaired but produces little interference with daily routines (minimal daytime sleepiness).         | Sleep very impaired during the night and may sleep regularly the day.                                      | Extremely poor sleep; may be distressed during the night; partner's sleep markedly disturbed.                                                           |
| 14 | <b>Altered sense of humour</b><br>Change in sense of humour, finds things funny which others don't                        | Sense of humour possibly altered but of questionable significance.                                          | Mild but definite change in sense of humour. May find things funny which others don't.                               | Sense of humour completely different from previously (e.g. may prefer more physical or 'slapstick' humour) | Complete loss of sense of humour.                                                                                                                       |

Supplementary Table 2. Severity of neuropsychiatric symptoms in controls and mutation carriers. Scores are shown as mean (standard deviation).

**Bold items are significantly different to controls using linear regression ( $p < 0.05$ ). Other differences are shown as <sup>a</sup>significantly impaired compared to GRN, <sup>b</sup>significantly impaired compared to MAPT and <sup>c</sup>significantly impaired compared to C9orf72 using logistic regression ( $p < 0.05$ ).**

|                          | Controls    | All mutation carriers |                    |                    | C9orf72     |             |                                 | GRN         |                    |                    | MAPT        |             |                                 |
|--------------------------|-------------|-----------------------|--------------------|--------------------|-------------|-------------|---------------------------------|-------------|--------------------|--------------------|-------------|-------------|---------------------------------|
|                          |             | CDR 0                 | CDR 0.5            | CDR 1+             | CDR 0       | CDR 0.5     | CDR 1+                          | CDR 0       | CDR 0.5            | CDR 1+             | CDR 0       | CDR 0.5     | CDR 1+                          |
| Visual hallucinations    | 0.00 (0.03) | 0.01 (0.12)           | <b>0.04 (0.15)</b> | <b>0.17 (0.47)</b> | 0.02 (0.19) | 0.04 (0.18) | <b>0.26 (0.58)<sup>a</sup></b>  | 0.00 (0.00) | 0.03 (0.12)        | 0.10 (0.36)        | 0.00 (0.00) | 0.04 (0.13) | 0.06 (0.22)                     |
| Auditory hallucinations  | 0.01 (0.12) | 0.00 (0.06)           | 0.00 (0.00)        | <b>0.17 (0.53)</b> | 0.01 (0.09) | 0.00 (0.00) | <b>0.31 (0.71)</b>              | 0.00 (0.00) | 0.00 (0.00)        | 0.06 (0.21)        | 0.00 (0.00) | 0.00 (0.00) | 0.00 (0.00)                     |
| Tactile hallucinations   | 0.00 (0.00) | 0.00 (0.03)           | 0.01 (0.08)        | <b>0.07 (0.38)</b> | 0.00 (0.05) | 0.03 (0.11) | <b>0.14 (0.53)</b>              | 0.00 (0.00) | 0.00 (0.00)        | 0.00 (0.00)        | 0.00 (0.00) | 0.00 (0.00) | 0.02 (0.10)                     |
| Delusions                | 0.01 (0.07) | 0.01 (0.07)           | 0.01 (0.06)        | <b>0.32 (0.65)</b> | 0.00 (0.05) | 0.00 (0.00) | <b>0.51 (0.81)<sup>ab</sup></b> | 0.00 (0.00) | 0.00 (0.00)        | <b>0.13 (0.36)</b> | 0.02 (0.14) | 0.04 (0.13) | 0.16 (0.47)                     |
| Depression               | 0.12 (0.39) | 0.09 (0.33)           | <b>0.30 (0.52)</b> | <b>0.48 (0.73)</b> | 0.09 (0.33) | 0.26 (0.58) | <b>0.53 (0.81)</b>              | 0.07 (0.27) | <b>0.29 (0.38)</b> | <b>0.45 (0.64)</b> | 0.14 (0.44) | 0.43 (0.62) | <b>0.40 (0.68)</b>              |
| Anxiety                  | 0.15 (0.42) | 0.10 (0.35)           | <b>0.33 (0.47)</b> | <b>0.57 (0.73)</b> | 0.08 (0.32) | 0.30 (0.48) | <b>0.62 (0.78)</b>              | 0.12 (0.41) | <b>0.34 (0.49)</b> | <b>0.49 (0.67)</b> | 0.08 (0.26) | 0.39 (0.45) | <b>0.58 (0.75)</b>              |
| Irritability/lability    | 0.09 (0.30) | 0.03 (0.13)           | <b>0.21 (0.42)</b> | <b>0.60 (0.79)</b> | 0.03 (0.11) | 0.23 (0.42) | <b>0.71 (0.84)</b>              | 0.02 (0.12) | 0.19 (0.44)        | <b>0.42 (0.68)</b> | 0.04 (0.17) | 0.18 (0.37) | <b>0.68 (0.83)</b>              |
| Agitation/aggression     | 0.02 (0.17) | 0.01 (0.06)           | 0.07 (0.20)        | <b>0.31 (0.55)</b> | 0.01 (0.07) | 0.08 (0.25) | <b>0.37 (0.61)</b>              | 0.00 (0.04) | 0.08 (0.19)        | <b>0.18 (0.34)</b> | 0.01 (0.07) | 0.00 (0.00) | <b>0.42 (0.67)</b>              |
| Euphoria/elation         | 0.00 (0.03) | 0.01 (0.05)           | <b>0.04 (0.18)</b> | <b>0.34 (0.66)</b> | 0.01 (0.08) | 0.04 (0.18) | <b>0.42 (0.76)</b>              | 0.00 (0.00) | 0.03 (0.18)        | <b>0.17 (0.39)</b> | 0.00 (0.00) | 0.07 (0.18) | <b>0.44 (0.75)</b>              |
| Aberrant motor behaviour | 0.01 (0.07) | 0.00 (0.06)           | 0.03 (0.12)        | <b>0.51 (0.84)</b> | 0.00 (0.00) | 0.03 (0.11) | <b>0.60 (0.92)</b>              | 0.00 (0.00) | 0.05 (0.15)        | <b>0.35 (0.68)</b> | 0.02 (0.14) | 0.00 (0.00) | <b>0.56 (0.89)</b>              |
| Hypersexuality           | 0.00 (0.03) | 0.00 (0.00)           | 0.02 (0.09)        | <b>0.21 (0.57)</b> | 0.00 (0.00) | 0.04 (0.14) | <b>0.24 (0.59)</b>              | 0.00 (0.00) | 0.00 (0.00)        | <b>0.13 (0.43)</b> | 0.00 (0.00) | 0.00 (0.00) | 0.26 (0.72)                     |
| Hyperreligiosity         | 0.00 (0.00) | 0.00 (0.03)           | 0.01 (0.08)        | <b>0.14 (0.52)</b> | 0.00 (0.00) | 0.00 (0.00) | <b>0.18 (0.60)</b>              | 0.00 (0.04) | 0.03 (0.12)        | 0.05 (0.20)        | 0.00 (0.00) | 0.00 (0.00) | 0.24 (0.71)                     |
| Impaired sleep           | 0.13 (0.40) | 0.06 (0.27)           | 0.25 (0.49)        | <b>0.55 (0.76)</b> | 0.02 (0.12) | 0.24 (0.47) | <b>0.69 (0.87)</b>              | 0.07 (0.29) | 0.31 (0.57)        | <b>0.38 (0.57)</b> | 0.12 (0.43) | 0.14 (0.31) | <b>0.48 (0.70)</b>              |
| Altered sense of humour  | 0.00 (0.04) | 0.00 (0.03)           | 0.03 (0.14)        | <b>0.60 (0.84)</b> | 0.00 (0.00) | 0.05 (0.20) | <b>0.52 (0.79)</b>              | 0.00 (0.04) | 0.02 (0.09)        | <b>0.47 (0.70)</b> | 0.00 (0.00) | 0.00 (0.00) | <b>1.12 (1.07)<sup>ac</sup></b> |

**Supplementary Table 3. Principal component analysis of (a) neuropsychiatric symptoms and (b) combined neuropsychiatric and behavioural symptoms in *C9orf72*, *GRN* and *MAPT* mutation carriers. As there were no observations for tactile hallucination in the *GRN* group, and for auditory hallucinations in the *MAPT* group these variables were excluded from the PCA in these groups.**

(a)

| Component                | <i>C9orf72</i> |             |             |             | <i>GRN</i>  |             |             | <i>MAPT</i> |             |             |             |
|--------------------------|----------------|-------------|-------------|-------------|-------------|-------------|-------------|-------------|-------------|-------------|-------------|
|                          | 1              | 2           | 3           | 4           | 1           | 2           | 3           | 1           | 2           | 3           | 4           |
| Visual hallucinations    | 0.00           | 0.89        | 0.27        | 0.00        | 0.49        | 0.71        | 0.00        | 0.76        | -0.39       | -0.49       | -0.13       |
| Auditory hallucinations  | 0.22           | 0.86        | 0.26        | 0.00        | 0.23        | 0.84        | 0.33        | -           | -           | -           | -           |
| Tactile hallucinations   | 0.33           | 0.17        | 0.42        | -0.81       | -           | -           | -           | -0.37       | 0.74        | -0.43       | -0.36       |
| Delusions                | 0.41           | 0.74        | 0.33        | 0.00        | 0.76        | 0.25        | 0.18        | 0.00        | 0.00        | 0.85        | 0.27        |
| Depression               | 0.00           | 0.20        | 0.83        | -0.14       | 0.14        | 0.34        | 0.78        | 0.27        | 0.00        | 0.25        | 0.82        |
| Anxiety                  | 0.13           | 0.41        | 0.72        | 0.00        | 0.26        | 0.12        | 0.85        | 0.32        | 0.57        | 0.00        | 0.50        |
| Irritability/lability    | 0.62           | 0.00        | 0.65        | 0.15        | 0.74        | 0.21        | 0.49        | 0.00        | 0.84        | 0.20        | 0.31        |
| Agitation/aggression     | 0.66           | 0.00        | 0.61        | 0.14        | 0.85        | 0.16        | 0.35        | 0.56        | 0.68        | -0.10       | 0.00        |
| Euphoria/elation         | 0.84           | 0.23        | 0.17        | 0.00        | 0.69        | 0.58        | 0.00        | 0.21        | 0.21        | 0.87        | 0.00        |
| Aberrant motor behaviour | 0.68           | 0.55        | 0.00        | 0.00        | 0.69        | 0.40        | 0.21        | 0.88        | 0.14        | 0.18        | 0.25        |
| Hypersexuality           | 0.76           | 0.11        | 0.18        | -0.26       | 0.59        | 0.68        | 0.34        | 0.00        | 0.80        | 0.46        | 0.00        |
| Hyperreligiosity         | 0.20           | 0.46        | 0.17        | 0.83        | 0.00        | 0.66        | 0.50        | 0.76        | 0.00        | 0.52        | -0.18       |
| Impaired sleep           | 0.32           | 0.39        | 0.69        | 0.00        | 0.34        | 0.16        | 0.72        | -0.22       | 0.00        | 0.11        | 0.88        |
| Altered sense of humour  | 0.76           | 0.49        | 0.00        | 0.27        | 0.39        | 0.76        | 0.20        | 0.58        | 0.18        | 0.61        | 0.33        |
| Cumulative variance      | <b>0.26</b>    | <b>0.50</b> | <b>0.71</b> | <b>0.82</b> | <b>0.29</b> | <b>0.56</b> | <b>0.77</b> | <b>0.23</b> | <b>0.45</b> | <b>0.68</b> | <b>0.85</b> |

(b)

| Component                              | C9orf72     |             |             |             | GRN         |             |             |             | MAPT        |             |             |             |
|----------------------------------------|-------------|-------------|-------------|-------------|-------------|-------------|-------------|-------------|-------------|-------------|-------------|-------------|
|                                        | 1           | 2           | 3           | 4           | 1           | 2           | 3           | 4           | 1           | 2           | 3           | 4           |
| Visual hallucinations                  | 0.25        | 0.86        | 0.26        | 0.11        | 0.38        | 0.78        | 0.00        | 0.11        | 0.43        | -0.26       | -0.13       | -0.84       |
| Auditory hallucinations                | 0.41        | 0.81        | 0.22        | 0.10        | 0.25        | 0.74        | 0.30        | 0.50        | -           | -           | -           | -           |
| Tactile hallucinations                 | 0.32        | 0.15        | 0.42        | -0.81       | -           | -           | -           | -           | -0.42       | 0.85        | -0.27       | 0.00        |
| Delusions                              | 0.47        | 0.66        | 0.35        | 0.00        | 0.68        | 0.29        | 0.32        | -0.13       | 0.43        | -0.11       | 0.22        | 0.71        |
| Depression                             | 0.00        | 0.22        | 0.83        | -0.11       | 0.00        | 0.33        | 0.75        | 0.35        | 0.25        | -0.13       | 0.83        | 0.00        |
| Anxiety                                | 0.16        | 0.40        | 0.72        | 0.00        | 0.15        | 0.00        | 0.86        | 0.19        | 0.22        | 0.45        | 0.62        | 0.00        |
| Irritability/lability                  | 0.61        | 0.00        | 0.65        | 0.00        | 0.45        | 0.41        | 0.67        | -0.14       | 0.17        | 0.74        | 0.41        | 0.28        |
| Agitation/aggression                   | 0.67        | -0.13       | 0.61        | 0.00        | 0.55        | 0.39        | 0.57        | -0.27       | 0.54        | 0.69        | 0.00        | -0.29       |
| Euphoria/elation                       | 0.82        | 0.00        | 0.20        | -0.15       | 0.53        | 0.72        | 0.23        | 0.00        | 0.63        | 0.00        | 0.11        | 0.65        |
| Aberrant motor behaviour               | 0.73        | 0.42        | 0.12        | 0.00        | 0.75        | 0.26        | 0.29        | 0.00        | 0.83        | 0.00        | 0.27        | -0.28       |
| Hypersexuality                         | 0.70        | 0.00        | 0.23        | -0.30       | 0.53        | 0.61        | 0.41        | 0.25        | 0.33        | 0.67        | 0.00        | 0.47        |
| Hyperreligiosity                       | 0.33        | 0.39        | 0.17        | 0.83        | 0.31        | 0.14        | 0.35        | 0.72        | 0.79        | 0.00        | -0.11       | 0.00        |
| Impaired sleep                         | 0.32        | 0.33        | 0.70        | 0.00        | 0.41        | 0.00        | 0.69        | 0.20        | 0.00        | 0.00        | 0.82        | 0.25        |
| Altered sense of humour                | 0.81        | 0.34        | 0.00        | 0.20        | 0.62        | 0.48        | 0.14        | 0.44        | 0.87        | 0.00        | 0.31        | 0.24        |
| Disinhibition                          | 0.79        | 0.37        | 0.27        | -0.14       | 0.70        | 0.52        | 0.20        | 0.00        | 0.73        | 0.62        | 0.00        | 0.13        |
| Apathy                                 | 0.74        | 0.37        | 0.38        | 0.11        | 0.80        | 0.25        | 0.19        | 0.35        | 0.86        | 0.00        | 0.25        | 0.00        |
| Loss of sympathy/empathy               | 0.75        | 0.41        | 0.31        | 0.16        | 0.83        | 0.37        | 0.15        | 0.23        | 0.77        | 0.45        | 0.00        | 0.00        |
| Ritualistic/compulsive behaviour       | 0.79        | 0.30        | 0.22        | 0.00        | 0.72        | 0.28        | 0.31        | 0.30        | 0.68        | 0.56        | 0.14        | 0.14        |
| Hyperorality and appetite changes      | 0.83        | 0.38        | 0.11        | 0.13        | 0.77        | 0.20        | 0.35        | 0.26        | 0.88        | 0.00        | 0.24        | 0.20        |
| Poor response to social/emotional cues | 0.76        | 0.37        | 0.29        | 0.00        | 0.93        | 0.23        | 0.14        | 0.14        | 0.81        | 0.48        | 0.11        | 0.00        |
| Inappropriate trusting behaviour       | 0.81        | 0.33        | 0.15        | 0.00        | 0.80        | 0.36        | 0.16        | 0.17        | 0.90        | 0.12        | 0.10        | 0.13        |
| Cumulative variance                    | <b>0.39</b> | <b>0.56</b> | <b>0.73</b> | <b>0.81</b> | <b>0.37</b> | <b>0.55</b> | <b>0.73</b> | <b>0.82</b> | <b>0.40</b> | <b>0.59</b> | <b>0.71</b> | <b>0.82</b> |

**Supplementary Table 4. Methodology for calculating the Algorithm-based Behaviour Score.**

| <b>Individual scores</b>                | <b>Overall score</b> |
|-----------------------------------------|----------------------|
| All 0                                   | 0                    |
| Maximum 0.5                             | 0.5                  |
| Maximum > 0.5:                          |                      |
| Maximum 1, all others 0                 | 0.5                  |
| Maximum 2 or 3, all others 0            | 1                    |
| Maximum occurs once, another rating > 0 | One level < maximum  |
| Maximum occurs > once                   | Maximum score        |

Supplementary Figure 1. Longitudinal change in severity of depression and anxiety in asymptomatic (CDR<sup>®</sup> plus NACC FTLD Global score 0), prodromal (0.5) and symptomatic ( $\geq 1$ ) *C9orf72*, *GRN* and *MAPT* mutation carriers. Solid lines represent depression severity scores and dotted lines represent anxiety severity scores.

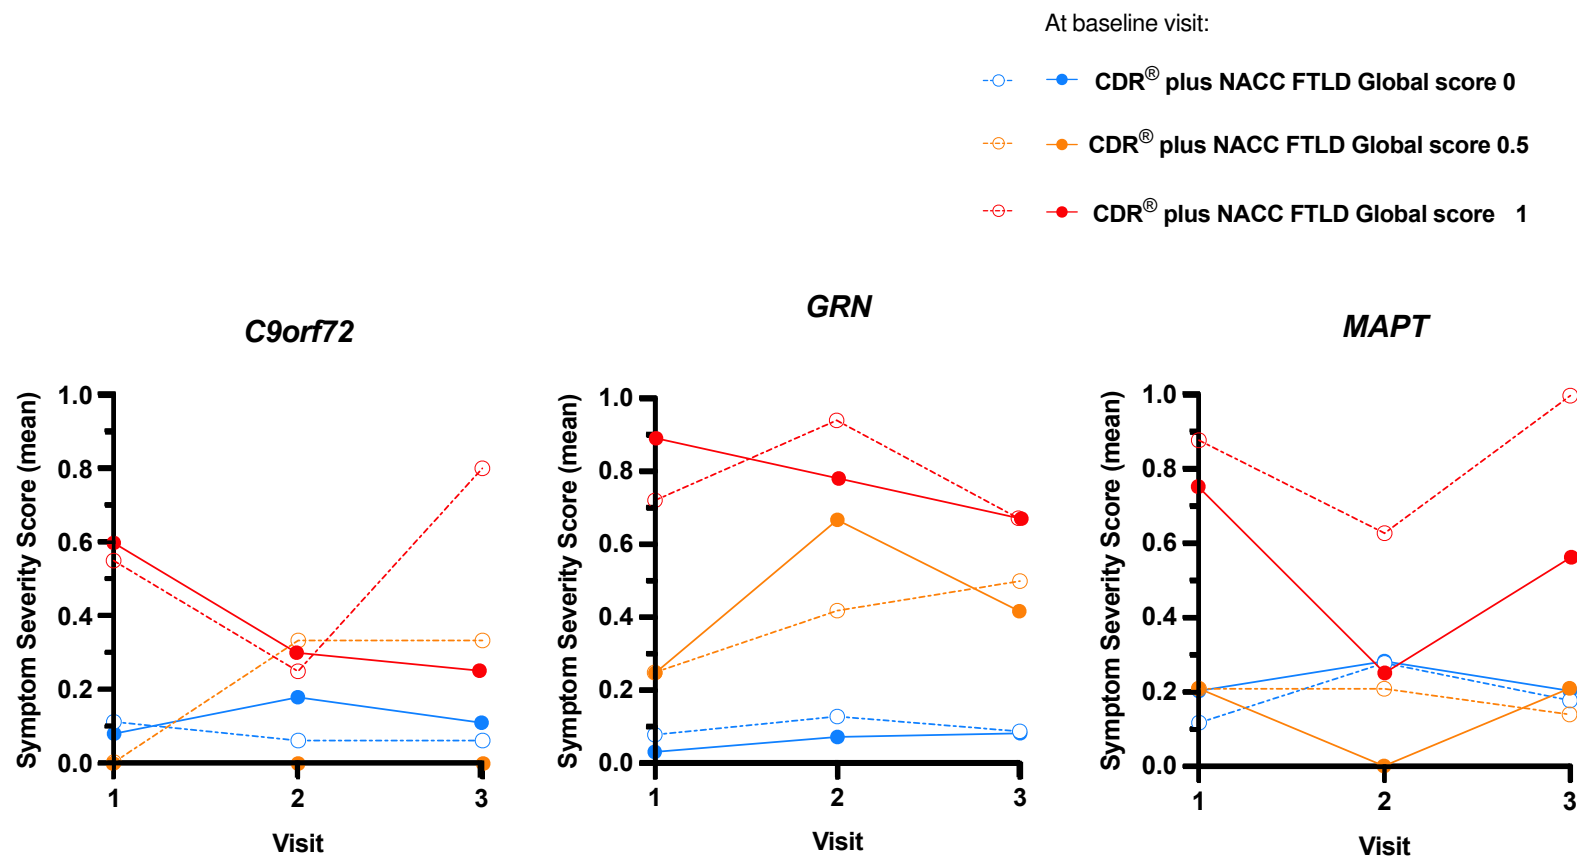

**Supplementary Figure 2. Comparison of Global Behaviour Score and newly designed Algorithm-based Behaviour Score. Individual (left panel) and group (right panel) comparisons are shown.**

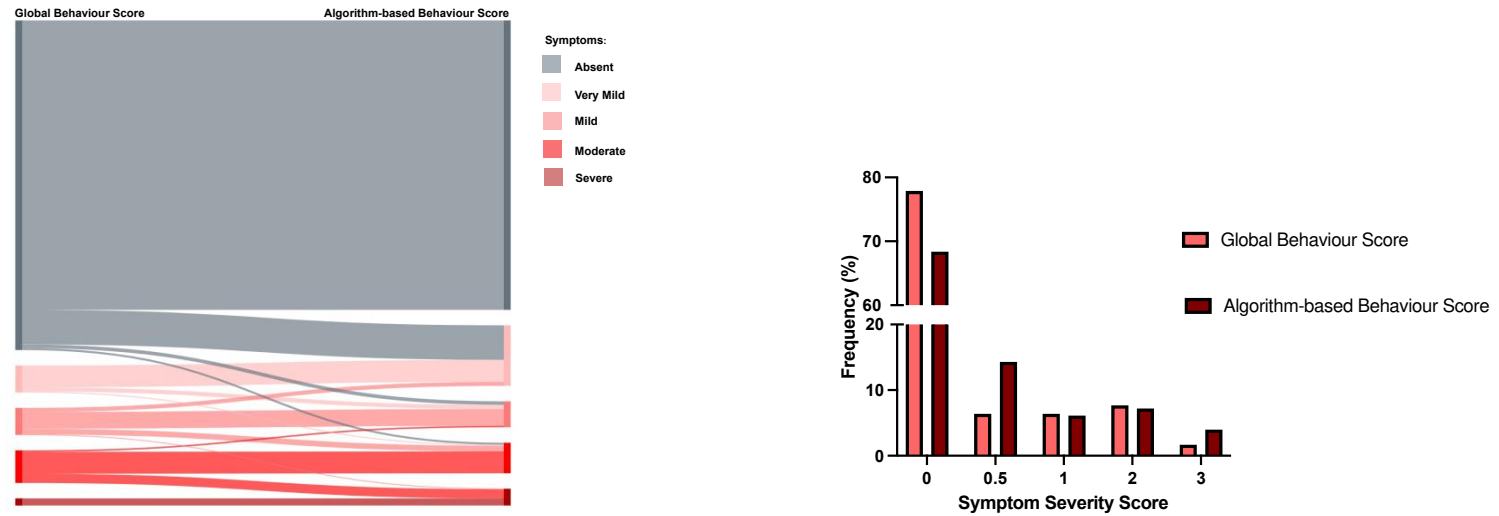



**Supplementary Figure 3. Comparison of the standard CDR® plus NACC FTLD with a new CDR® plus NACC FTLD which adds in a new Neuropsychiatric Score and replaces the original NACC global Behaviour component with an algorithm-based Behaviour Score (CDR® plus NACC FTLD-N-B+) in genetic mutation carrier groups (*C9orf72*, *GRN* and *MAPT*) judged clinically to be symptomatic.**

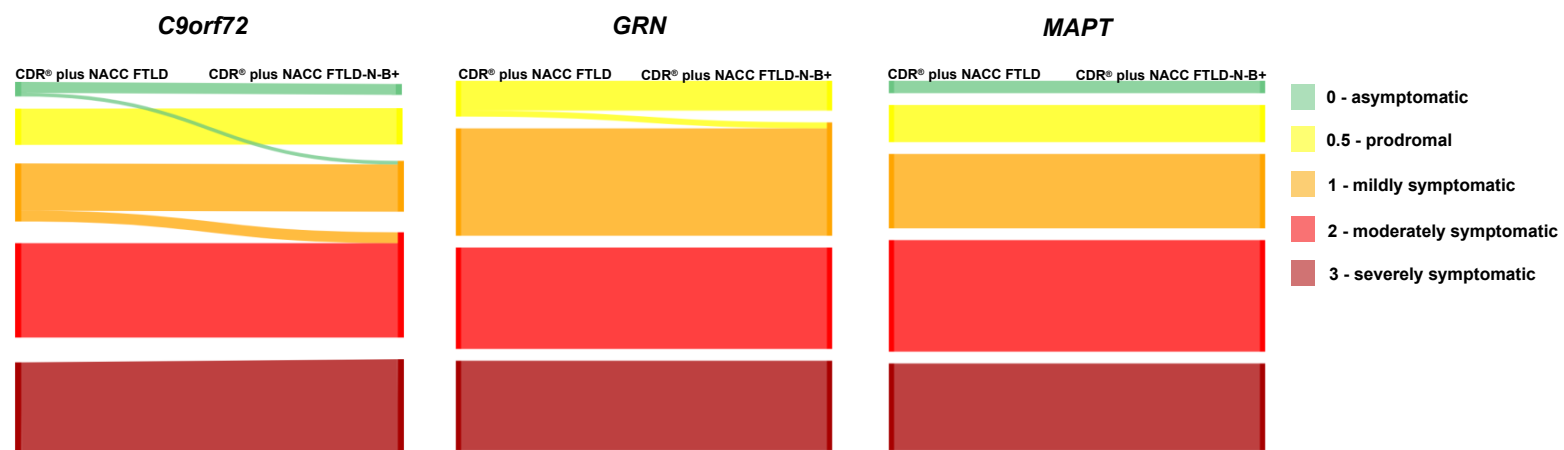

Supplement: jnnp-2022-330152supp001_data_supplement.pdf [file jnnp-2022-330152supp001_data_supplement.pdf]
